# Supplementary material
Source: bioRxiv or medRxiv preprint supplement (https://medrxiv.org/highwire/filestream/78898/field_highwire_adjunct_files/4/2020.04.28.20083246-5.pdf)

Figure S1. Clinical course of the former cancer patients during hospitalization.

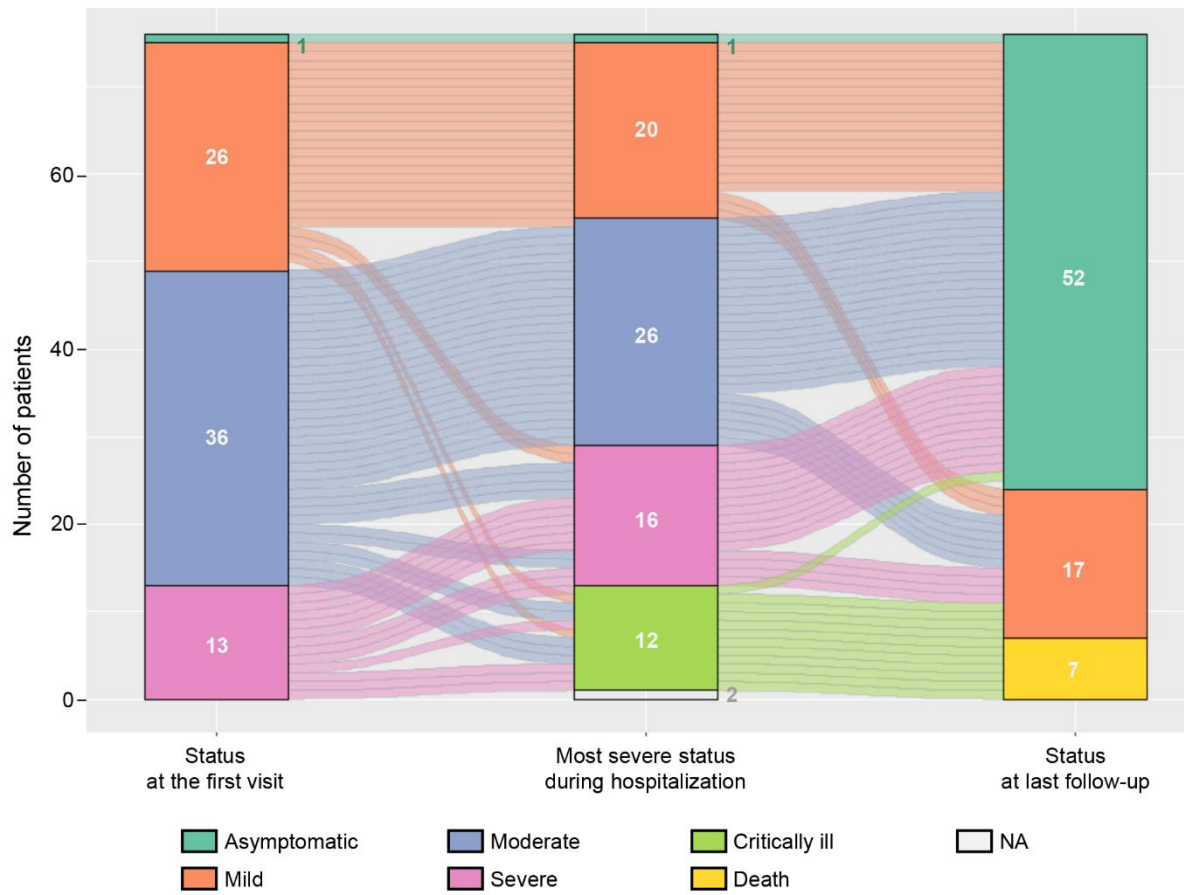

Supplement: Supplementary file [file 2020.04.28.20083246-5.pdf]
